# Supplementary material for: Clonal haematopoiesis harbouring AML-associated mutations is ubiquitous in healthy adults
Source: PubMed Central journal article supplement (PMC4996934; doi:10.1038/ncomms12484), 2016-08-22
Supplement: ncomms12484-s1.pdf [file ncomms12484-s1.pdf]

**Supplementary Figure 1** Coverage per amplicon for error-corrected sequencing experiments. Error-corrected consensus sequence (ECCS) coverage was calculated for each of the 568 amplicons in the capture panel. **a**, Histogram of ECCS coverage for all amplicons. **b**, Histogram of ECCS coverage in amplicons in which a variant was detected.

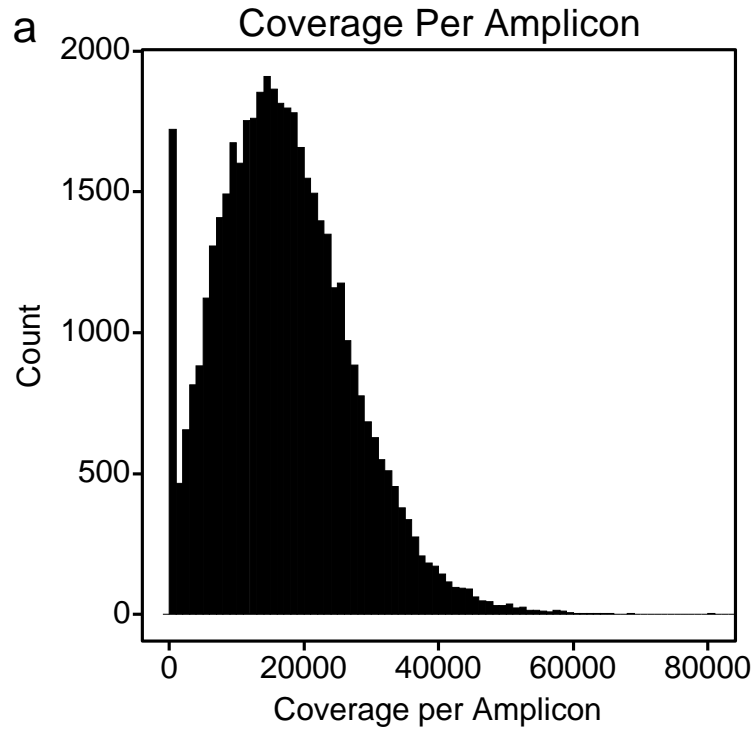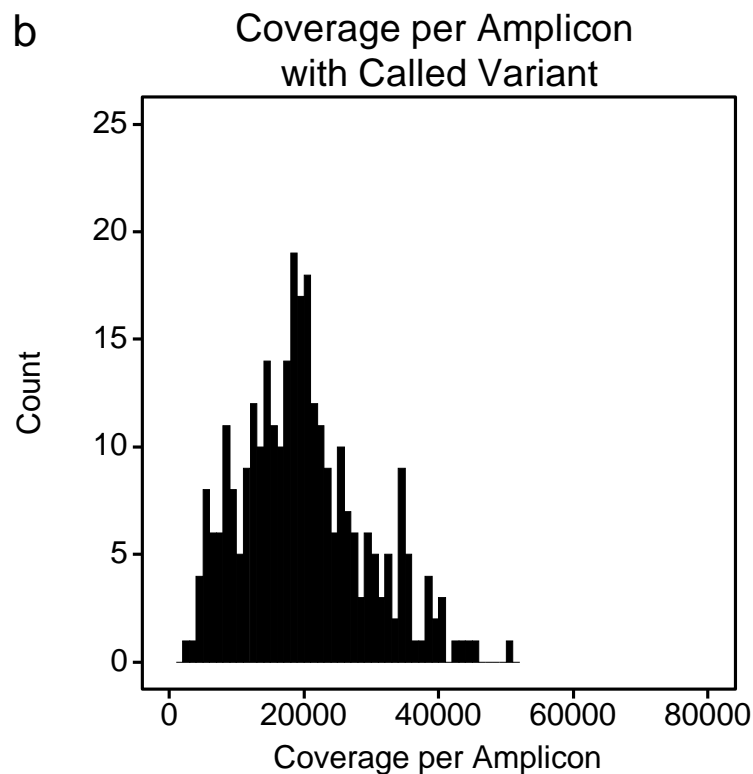

**Supplementary Figure 2** Number of mutations detected per gene in exons (top panel) and introns (bottom panel) relative to the capture space (bp = base pairs) targeting that gene in the panel.

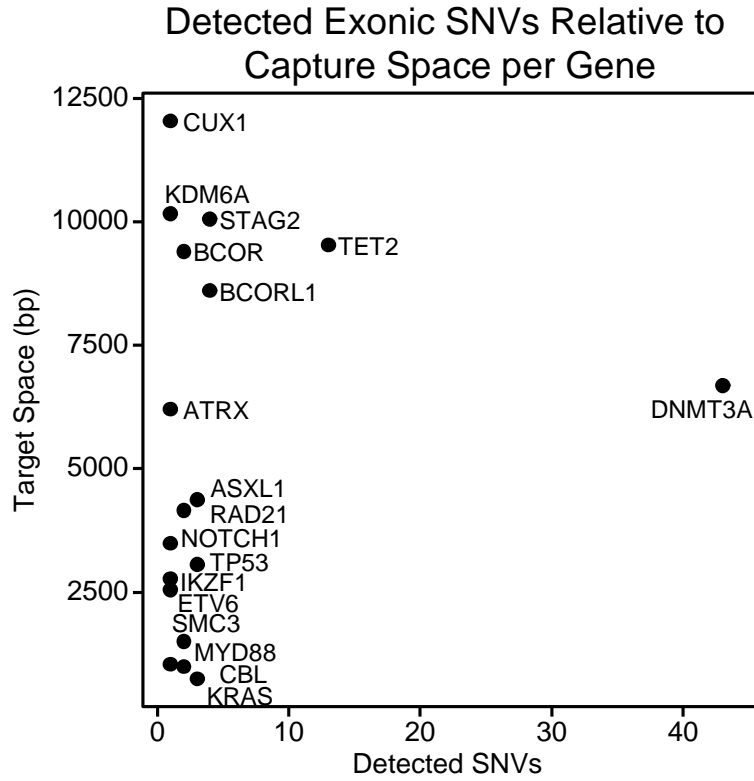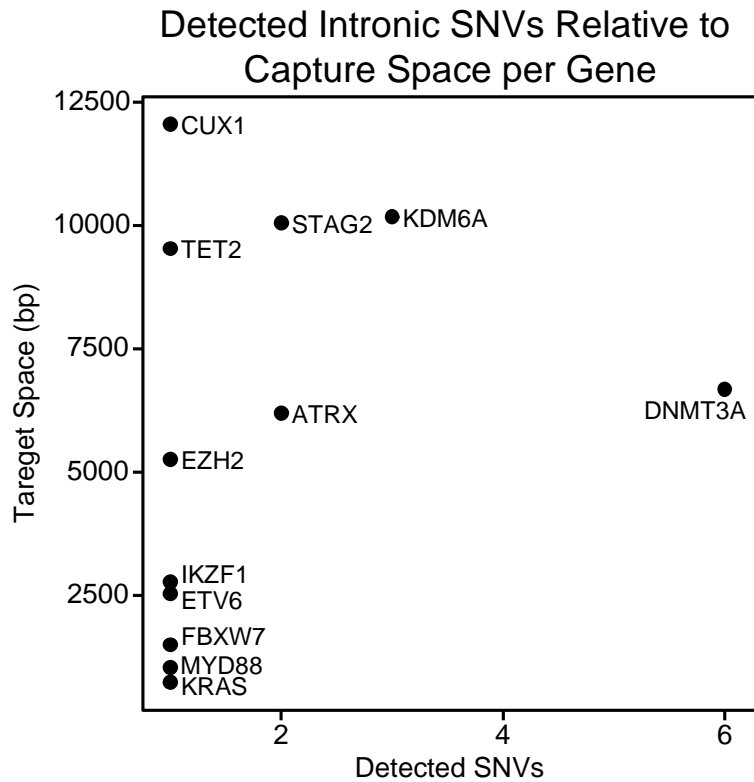

**Supplementary Figure 3** Representative droplet digital PCR (ddPCR) results from NHS participant 12 for the detected *DNMT3A* G543A clonal variant. The wild-type probe intensity in arbitrary units (A.U.) was plotted relative to the *DNMT3A* G543A (mutant) probe intensity for each droplet. **a-d**, Variant quantification at the first time point for **a**, all cells; **b**, B lymphocytes; **c**, T lymphocytes; and **d**, myeloid cells. **e-h**, Variant quantification at the second time point for **e**, all cells; **f**, B lymphocytes; **g**, T lymphocytes; and **h**, myeloid cells. **i**, The *DNMT3A* G543A variant was not detected in the negative control sample from participant 2, time point 2. **j**, Only *DNMT3A* G543A positive (or empty) droplets were detected in the gblock positive control.

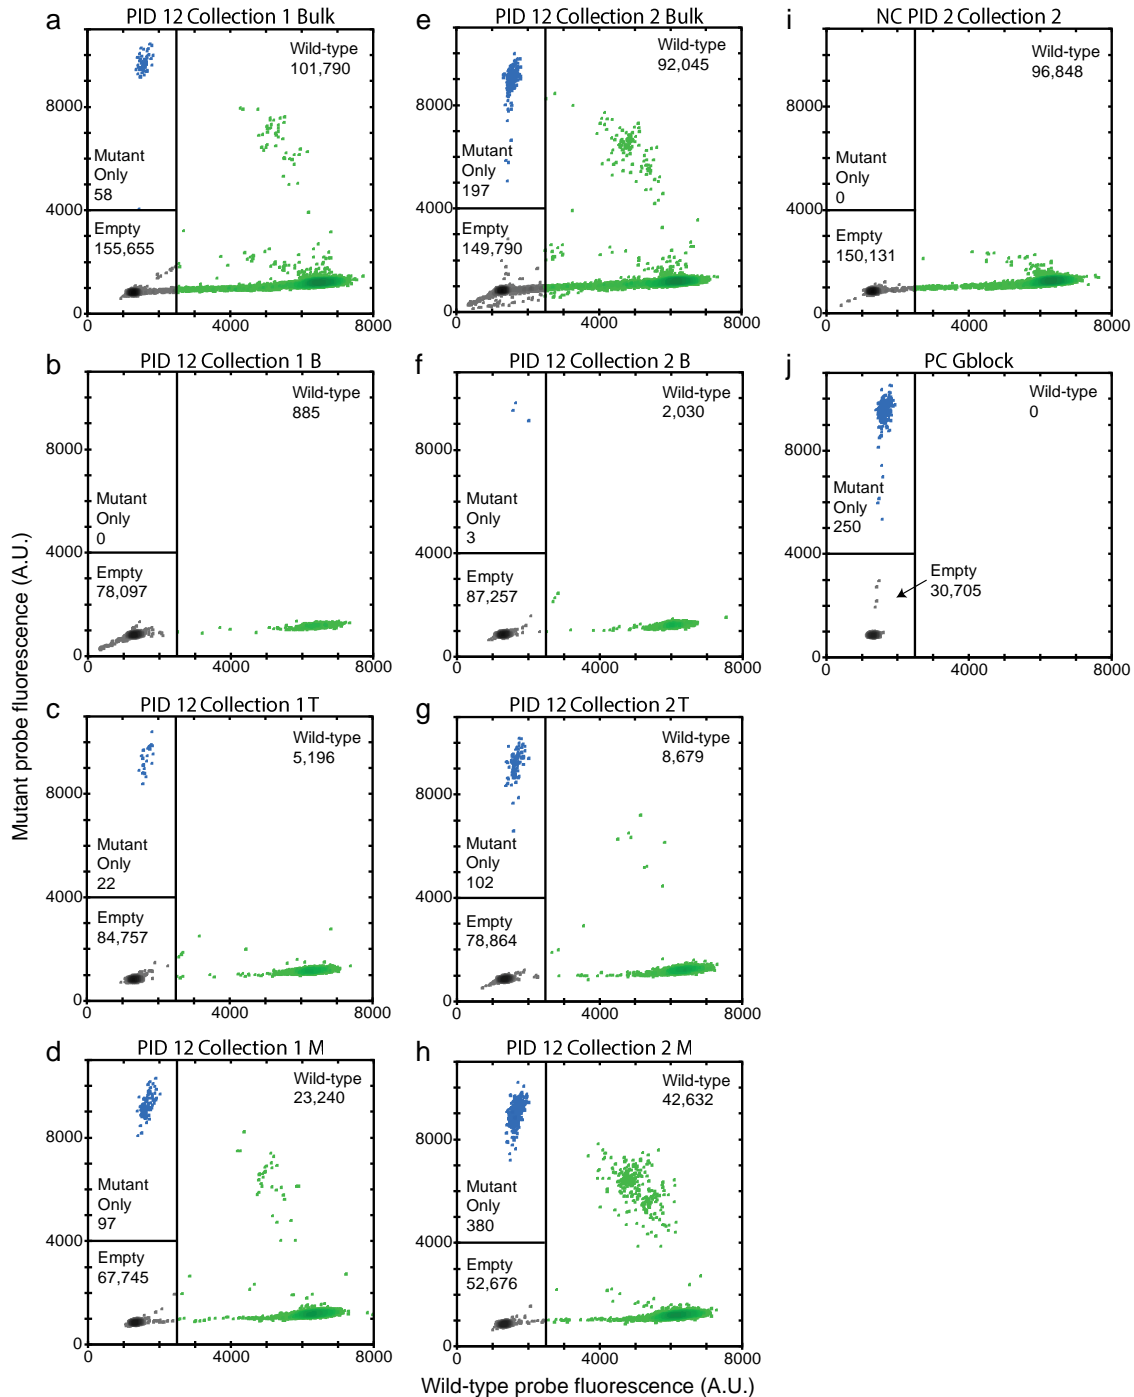

**Supplementary Figure 4.** Several mutations identified by error-corrected sequencing (ECS) were verified using droplet digital PCR (ddPCR). The variant allele fractions (VAFs) identified ECS and ddPCR were highly correlated ( $R^2=0.98$ ).

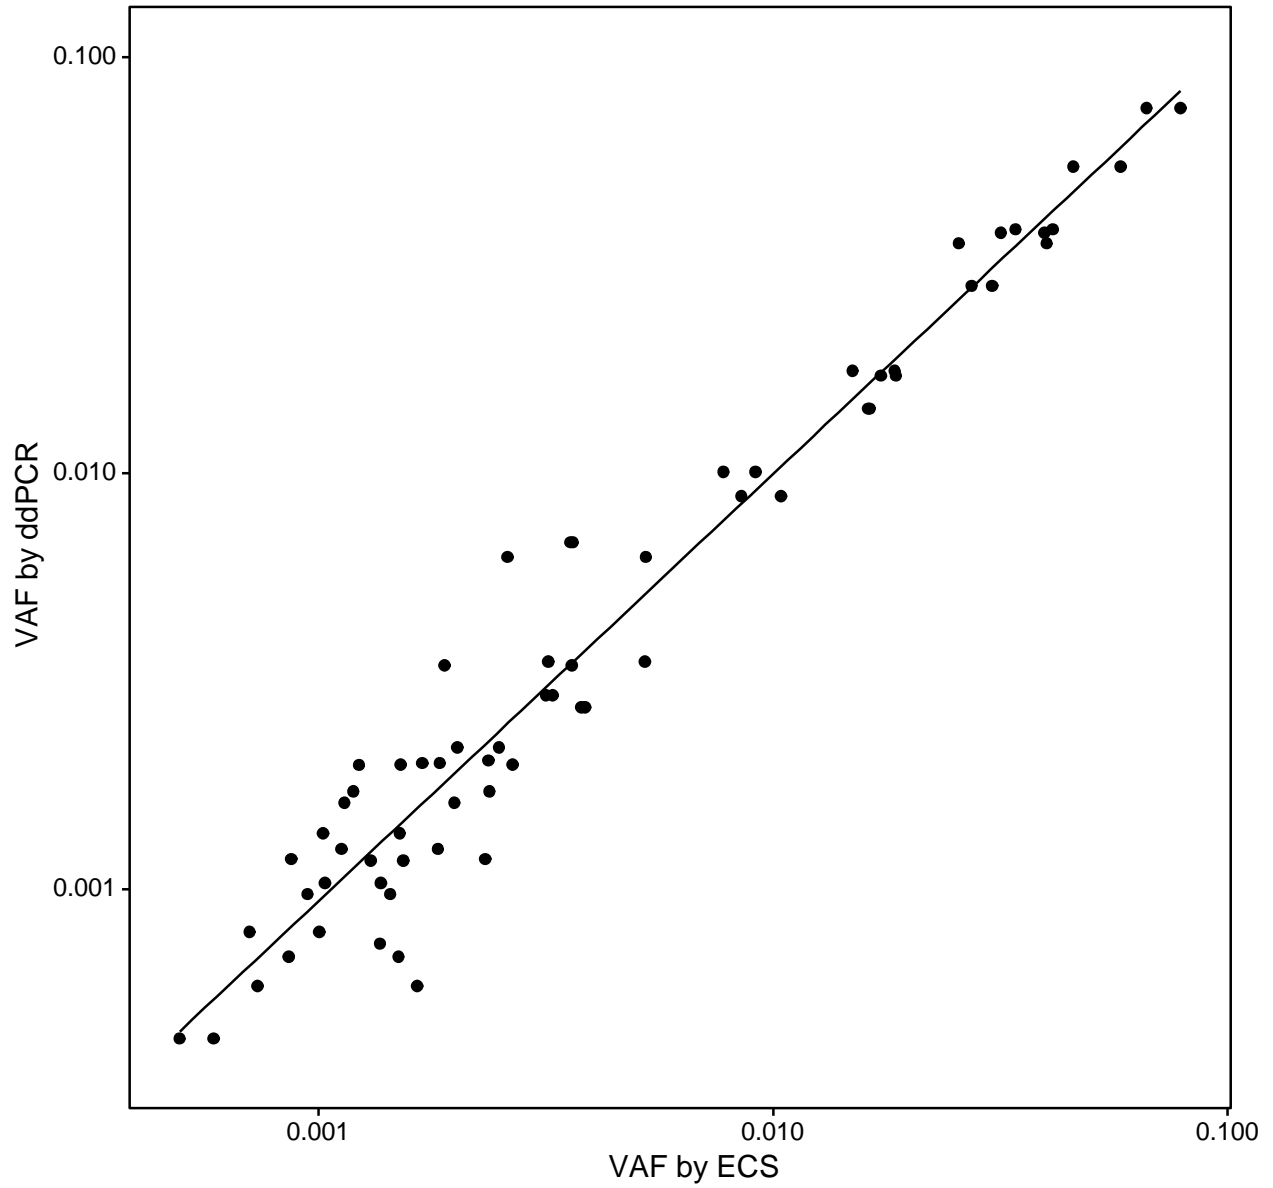



**Supplementary Figure 6** Detected exonic clonal single nucleotide variants (SNVs) in *DNMT3A*. The detected SNVs were predominantly nonsense mutations (blue) in the first half of the gene or missense mutations (red) in the three functional domains—a proline-tryptophan-tryptophan-proline (PWWP) chromatin targeting domain, a zinc finger nuclease (ZFN) domain and a S-adenosylmethionine (SAM) dependent methyltransferase (MTase) domain.

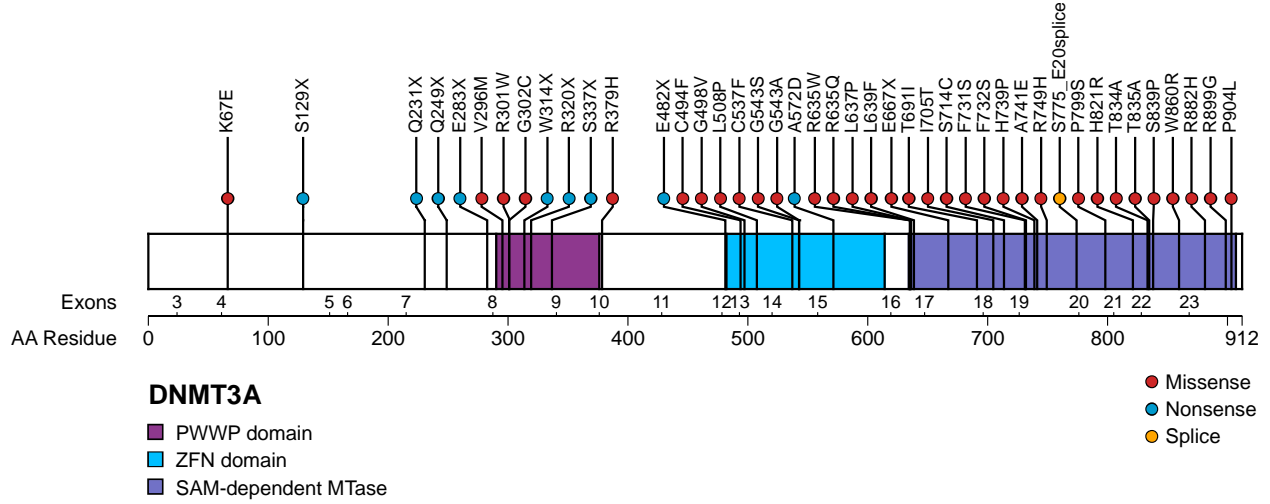

**Supplementary Figure 7** Detected exonic clonal single nucleotide variants in *TET2*.

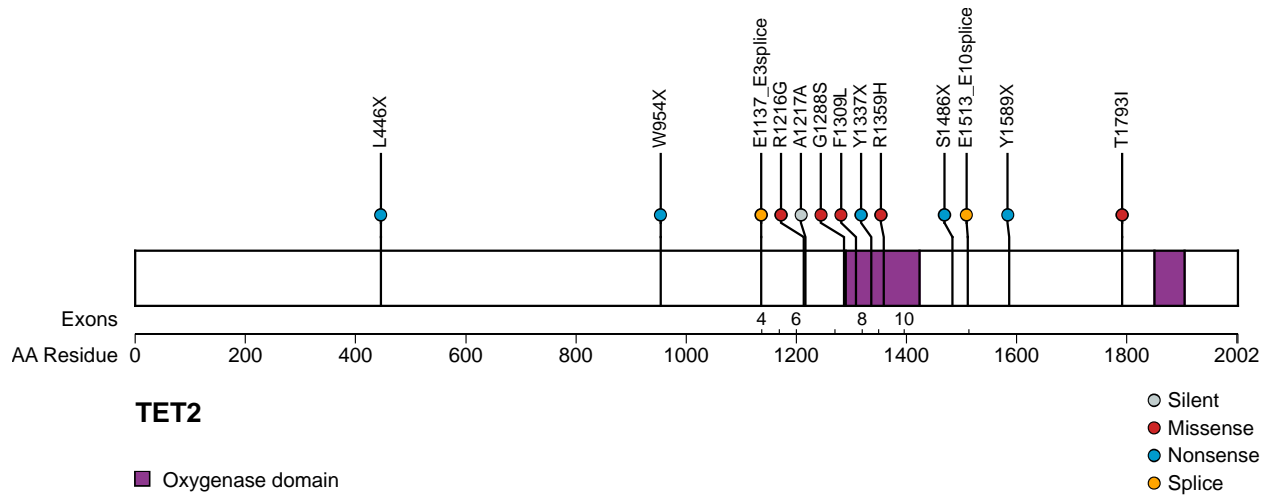

Supplementary Figure 8 Number of intronic clonal single nucleotide variants (SNVs) detected by gene.

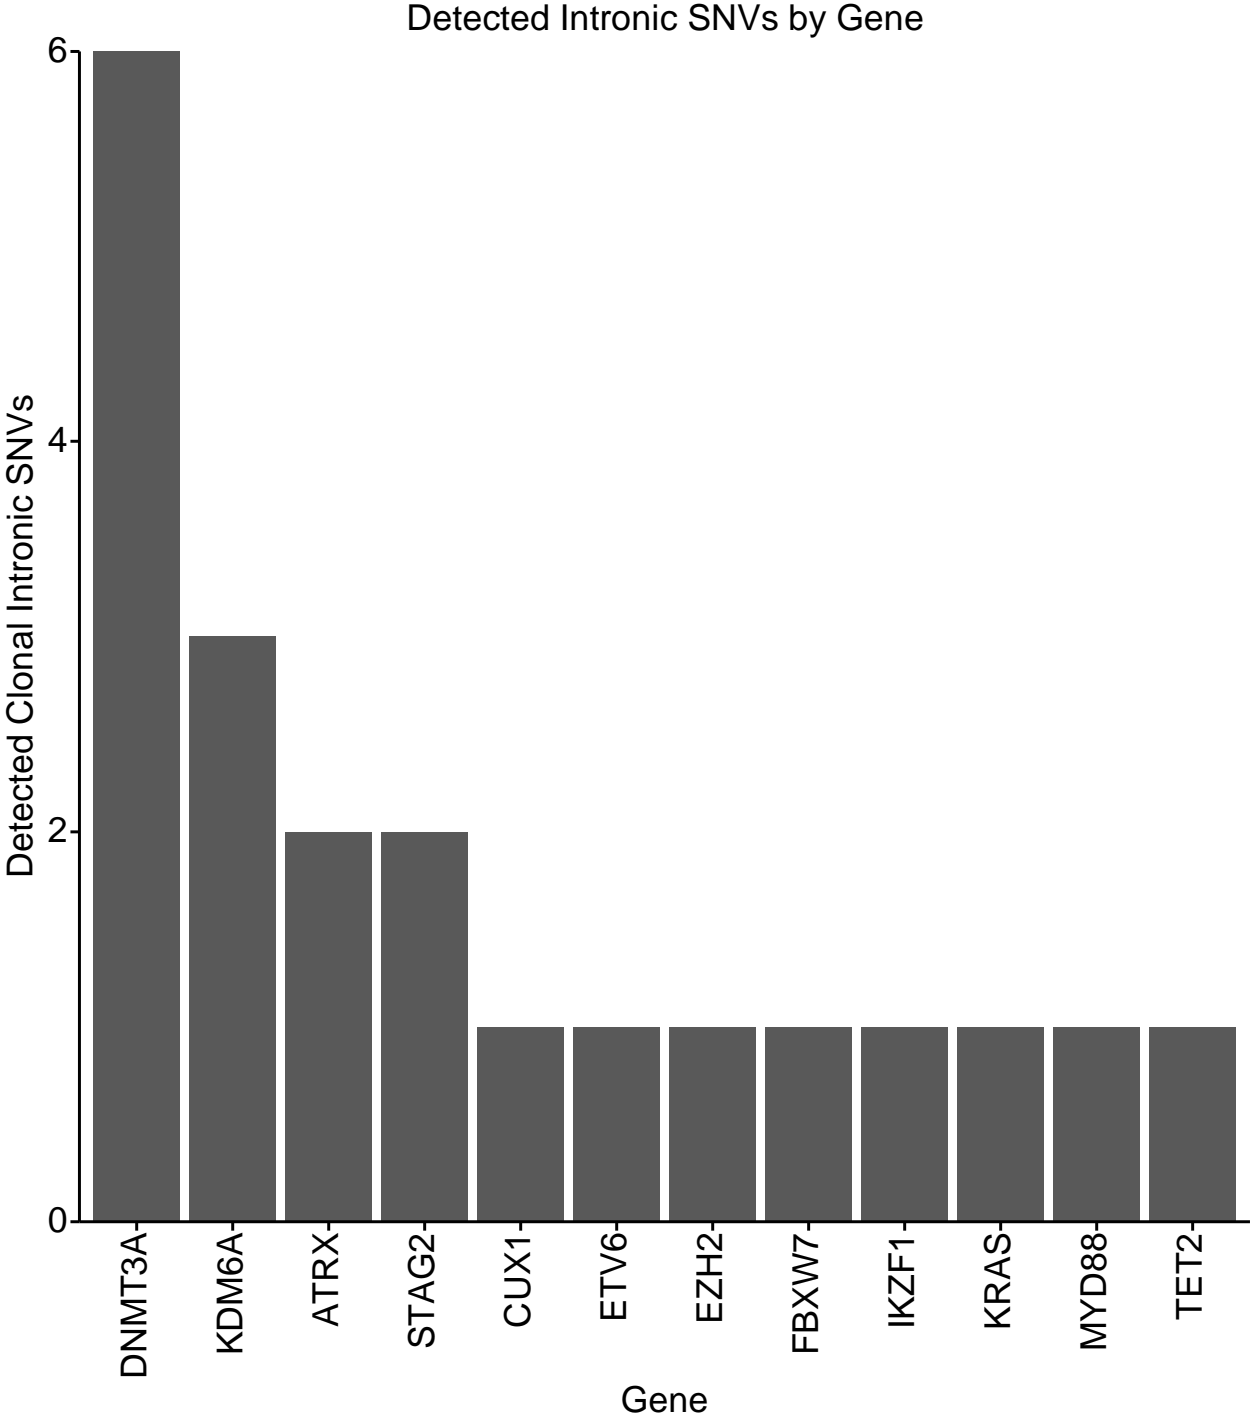





**Supplementary Figure 10** Representative flow cytometry gating strategy from NHS participant 5, time point 1 to isolate B lymphocytes, T lymphocytes and myeloid cells.

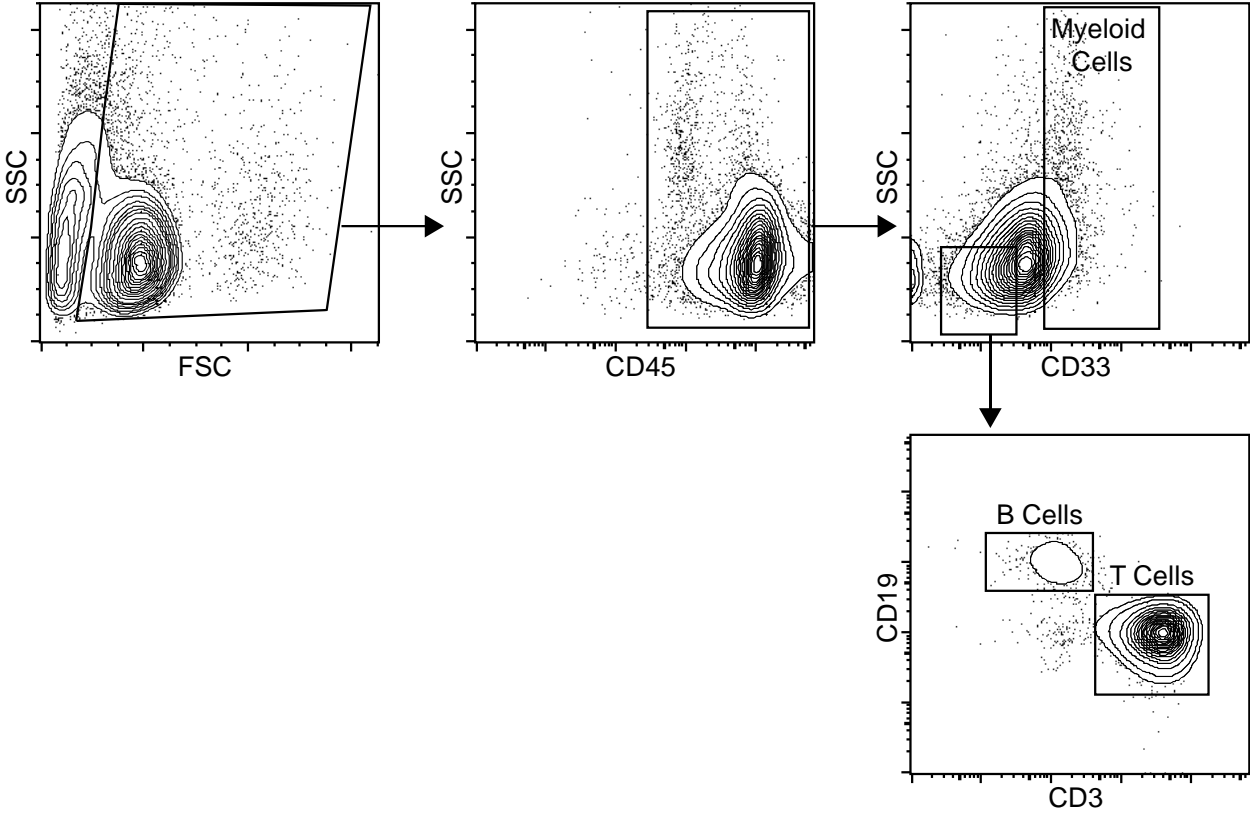

**Supplementary Table 1** Sequenced reads and error-corrected consensus sequences generated for each library.

| Participant ID | Collection 1 Replicate 1 |           | Collection 1 Replicate 2 |           | Collection 2 Replicate 1 |           | Collection 2 Replicate 2 |           |
|----------------|--------------------------|-----------|--------------------------|-----------|--------------------------|-----------|--------------------------|-----------|
|                | Raw Reads                | ECCS      | Raw Reads                | ECCS      | Raw Reads                | ECCS      | Raw Reads                | ECCS      |
| 1              | 38,483,255               | 3,333,626 | 33,448,218               | 2,804,567 | 35,427,539               | 2,987,274 | 33,392,978               | 2,784,229 |
| 2              | 39,268,072               | 3,318,173 | 41,984,812               | 3,558,516 | 35,157,811               | 3,027,607 | 33,657,209               | 2,860,180 |
| 3              | 32,603,819               | 2,581,039 | 36,107,671               | 2,959,152 | 48,998,142               | 3,584,046 | 40,599,238               | 3,291,215 |
| 4              | 30,932,163               | 2,212,764 | 30,623,846               | 2,501,632 | 39,579,433               | 3,254,544 | 48,529,452               | 3,503,765 |
| 5              | 35,011,143               | 2,727,030 | 34,151,207               | 2,411,821 | 52,302,285               | 3,759,106 | 55,049,072               | 4,017,037 |
| 6              | 34,207,169               | 2,863,690 | 35,084,657               | 2,946,669 | 50,852,817               | 3,682,303 | 48,351,486               | 3,514,019 |
| 7              | 41,658,678               | 2,663,917 | 42,508,068               | 2,714,869 | 45,885,262               | 3,233,300 | 44,468,353               | 3,548,708 |
| 8              | 44,771,597               | 2,734,288 | 41,632,517               | 2,528,357 | 50,072,031               | 3,399,553 | 50,378,471               | 3,698,270 |
| 9              | 39,449,116               | 2,531,229 | 41,067,140               | 2,599,127 | 60,014,462               | 4,197,532 | 50,347,145               | 3,993,077 |
| 10             | 40,492,765               | 2,554,060 | 38,729,489               | 2,400,500 | 59,870,612               | 4,034,423 | 58,962,293               | 3,996,550 |
| 11             | 48,940,303               | 3,684,038 | 44,034,692               | 3,456,949 | 64,520,183               | 4,096,893 | 56,501,287               | 3,797,404 |
| 12             | 57,115,177               | 4,245,185 | 48,446,875               | 3,692,857 | 61,813,583               | 4,322,748 | 59,452,070               | 4,110,288 |
| 13             | 39,368,839               | 3,059,660 | 41,269,631               | 3,343,408 | 59,327,495               | 4,213,628 | 52,689,305               | 4,173,008 |
| 14             | 38,837,743               | 3,076,601 | 37,306,017               | 2,976,419 | 60,366,370               | 4,053,326 | 58,109,532               | 4,501,213 |
| 15             | 54,605,075               | 3,407,283 | 44,547,457               | 2,490,226 | 58,101,101               | 3,908,542 | 51,539,869               | 4,104,014 |
| 16             | 52,226,742               | 2,986,829 | 60,744,391               | 3,907,372 | 45,532,881               | 3,414,608 | 60,632,143               | 4,027,633 |
| 17             | 57,985,852               | 4,079,429 | 51,835,232               | 3,373,746 | 55,355,241               | 3,721,052 | 59,501,527               | 4,096,858 |
| 18             | 54,185,217               | 3,337,380 | 54,495,083               | 3,388,504 | 57,117,288               | 4,147,180 | 58,064,485               | 3,999,074 |
| 19             | 52,213,946               | 2,947,031 | 51,028,264               | 3,343,682 | 53,983,868               | 3,723,161 | 48,268,843               | 3,796,565 |
| 20             | 51,521,626               | 3,376,026 | 41,417,619               | 2,806,990 | 58,651,106               | 4,092,482 | 56,692,728               | 3,793,691 |

**Supplementary Table 2** Clonal SNVs detected by error-corrected sequencing.

| Participant ID | Chr | Start     | End       | Ref Alt | Gene   | Amino Acid | COSMIC  | VAF1.1   | VAF1.2   | VAF2.1   | VAF2.2   |
|----------------|-----|-----------|-----------|---------|--------|------------|---------|----------|----------|----------|----------|
| 1              | 7   | 50444517  | 50444517  | T C     | IKZF1  | intronic   |         | 0.000922 | -        | 0.001021 | 0.002929 |
| 1              | X   | 123185174 | 123185174 | G T     | STAG2  | V376L      |         | 0.002824 | 0.001194 | 0.018021 | 0.016985 |
| 2              | 2   | 25463271  | 25463271  | G T     | DNMT3A | A741E      |         | 0.001124 | -        | 0.000988 | 0.001011 |
| 2              | 2   | 25463277  | 25463277  | T G     | DNMT3A | H739P      |         | 0.001713 | 0.000284 | 0.000365 | 0.000533 |
| 2              | 2   | 25466793  | 25466793  | A G     | DNMT3A | L637P      |         | 0.00136  | 0.003425 | 0.003549 | 0.005639 |
| 2              | 2   | 25468153  | 25468153  | A G     | DNMT3A | L508P      |         | -        | 0.001168 | 0.007558 | 0.008506 |
| 2              | 2   | 25470573  | 25470573  | G A     | DNMT3A | R301W      |         | -        | -        | 0.002601 | 0.003542 |
| 2              | 4   | 106164778 | 106164778 | C G     | TET2   | R1216G     |         | -        | -        | 0.00106  | 0.001038 |
| 2              | 4   | 106164783 | 106164783 | T A     | TET2   | A1217A     |         | -        | -        | 0.001053 | 0.001032 |
| 2              | 12  | 11803160  | 11803160  | G C     | ETV6   | intronic   |         | 0.001224 | 0.000567 | -        | -        |
| 4              | 2   | 25470516  | 25470516  | G A     | DNMT3A | R320X      | 133724  | 0.00363  | 0.00358  | 0.005249 | 0.002602 |
| 4              | 9   | 139391179 | 139391179 | G A     | NOTCH1 | Q2338X     |         | 0.001138 | 0.000967 | -        | -        |
| 4              | X   | 123184056 | 123184056 | G T     | STAG2  | R305L      | 254953  | 0.009143 | 0.007774 | 0.014936 | 0.018524 |
| 5              | 2   | 25466799  | 25466799  | C T     | DNMT3A | R635Q      | 1583088 | -        | -        | 0.001517 | 0.002674 |
| 6              | 2   | 25471183  | 25471183  | C G     | DNMT3A | intronic   |         | 0.001627 | 0.001534 | -        | -        |
| 6              | 3   | 38181952  | 38181952  | C T     | MYD88  | I192I      |         | -        | -        | 0.00177  | 0.001559 |
| 6              | 4   | 106180899 | 106180899 | T G     | TET2   | F1309L     |         | 0.001359 | 0.001286 | 0.000901 | 0.000766 |
| 6              | 7   | 101843537 | 101843537 | T G     | CUX1   | intronic   |         | 0.004012 | 0.004168 | 0.001704 | 0.005179 |
| 6              | 11  | 119148929 | 119148929 | A G     | CBL    | I383M      |         | 0.001394 | 0.000438 | -        | -        |
| 7              | 2   | 25457176  | 25457176  | G A     | DNMT3A | P904L      | 87007   | 0.002364 | -        | 0.008514 | 0.010401 |
| 7              | 2   | 25458673  | 25458673  | C G     | DNMT3A | T834A      |         | 0.002895 | 0.003496 | 0.002633 | 0.003961 |
| 7              | 2   | 25462012  | 25462012  | G A     | DNMT3A | P799S      |         | -        | -        | 0.002258 | 0.004782 |
| 7              | 2   | 25463372  | 25463372  | G A     | DNMT3A | intronic   |         | 0.004215 | 0.003861 | 0.003416 | -        |
| 7              | 2   | 25463384  | 25463384  | G A     | DNMT3A | intronic   |         | 0.006557 | 0.0082   | 0.002896 | -        |
| 7              | 2   | 25463385  | 25463385  | C G     | DNMT3A | intronic   |         | -        | -        | 0.006618 | 0.008666 |
| 7              | 2   | 25463387  | 25463387  | C G     | DNMT3A | intronic   |         | 0.006654 | 0.007867 | 0.003217 | -        |
| 7              | 2   | 25463389  | 25463389  | G A     | DNMT3A | intronic   |         | 0.006822 | 0.007738 | 0.003792 | -        |
| 7              | 2   | 25464441  | 25464441  | G A     | DNMT3A | T691I      |         | -        | -        | 0.00358  | 0.002517 |
| 7              | 2   | 25464514  | 25464514  | C A     | DNMT3A | E667X      |         | -        | -        | 0.001078 | 0.003162 |
| 7              | 2   | 25466788  | 25466788  | G A     | DNMT3A | L639F      |         | 0.021615 | 0.020599 | 0.040688 | 0.029481 |
| 7              | 2   | 25467449  | 25467449  | C T     | DNMT3A | G543S      |         | -        | -        | 0.004758 | 0.003253 |
| 7              | 4   | 106158509 | 106158509 | G A     | TET2   | splicing   | 87117   | -        | -        | 0.001024 | 0.001509 |
| 7              | 4   | 153249632 | 153249632 | T C     | FBXW7  | intronic   |         | 0.00035  | 0.000329 | -        | -        |
| 7              | 7   | 50367256  | 50367256  | C T     | IKZF1  | S21S       |         | 0.003464 | 0.004061 | 0.002104 | -        |
| 7              | X   | 76874262  | 76874262  | A T     | ATRX   | intronic   |         | -        | -        | 0.00046  | 0.000325 |
| 7              | X   | 123199914 | 123199914 | G T     | STAG2  | intronic   |         | -        | -        | 0.000751 | 0.000892 |
| 8              | 2   | 25468919  | 25468919  | C A     | DNMT3A | E482X      |         | -        | -        | 0.00305  | 0.004007 |
| 8              | 4   | 106180834 | 106180834 | A T     | TET2   | G1286S     | 110780  | 0.001193 | 0.002377 | 0.001991 | 0.00114  |
| 9              | 2   | 25459821  | 25459821  | T C     | DNMT3A | H821R      |         | -        | 0.002221 | 0.001677 | 0.002502 |
| 9              | 2   | 25462086  | 25462086  | T C     | DNMT3A | splicing   |         | 0.002556 | -        | 0.001467 | 0.001506 |
| 9              | 2   | 25463247  | 25463247  | C T     | DNMT3A | R749H      |         | 0.002072 | 0.017677 | 0.033274 | 0.035612 |
| 9              | 2   | 25463541  | 25463541  | G C     | DNMT3A | S714C      | 87011   | 0.027327 | 0.030296 | 0.04122  | 0.034103 |
| 9              | 2   | 25466800  | 25466800  | G A     | DNMT3A | R635W      | 87012   | 0.001896 | 0.003609 | -        | 0.001227 |
| 9              | 2   | 25467160  | 25467160  | G T     | DNMT3A | A572D      |         | -        | -        | 0.001003 | 0.002101 |
| 9              | 2   | 25469632  | 25469632  | C T     | DNMT3A | R379H      |         | -        | -        | 0.002941 | 0.005707 |
| 9              | 2   | 25470588  | 25470588  | C T     | DNMT3A | V296M      |         | -        | -        | 0.003471 | 0.003189 |
| 9              | 2   | 25471016  | 25471016  | G A     | DNMT3A | Q249X      |         | 0.00142  | -        | 0.001329 | 0.001299 |
| 9              | 4   | 106193995 | 106193995 | C G     | TET2   | S1486X     | 211625  | -        | -        | 0.000495 | 0.000588 |
| 9              | 20  | 31023091  | 31023091  | A G     | ASXL1  | N859S      |         | 0.004057 | 0.002914 | 0.00438  | 0.003188 |
| 9              | X   | 44733267  | 44733267  | T G     | KDM6A  | intronic   |         | -        | -        | 0.001671 | 0.001338 |
| 10             | 12  | 25380459  | 25380459  | G C     | KRAS   | intronic   |         | -        | -        | 0.001002 | 0.00086  |
| 10             | X   | 129162659 | 129162659 | C G     | BCORL1 | H1376Q     |         | 0.004852 | 0.002344 | 0.00182  | -        |
| 11             | 2   | 25458595  | 25458595  | A G     | DNMT3A | W860R      | 231568  | 0.000861 | 0.0015   | 0.002019 | 0.002493 |
| 11             | 2   | 25470914  | 25470914  | C A     | DNMT3A | F732S      |         | 0.004158 | 0.005587 | 0.012941 | 0.014349 |
| 11             | 2   | 25505372  | 25505372  | G C     | DNMT3A | S129X      |         | -        | -        | 0.000727 | 0.000548 |
| 11             | 3   | 38182245  | 38182245  | A T     | MYD88  | intronic   |         | -        | -        | 0.001872 | 0.002152 |
| 11             | 17  | 7577129   | 7577129   | A G     | TP53   | F270S      | 11305   | -        | -        | 0.000734 | 0.001649 |
| 11             | 20  | 31023606  | 31023606  | A T     | ASXL1  | K1031X     |         | 0.000673 | 0.000843 | -        | -        |
| 11             | X   | 39933358  | 39933358  | G A     | BCOR   | A414V      |         | -        | -        | 0.000583 | 0.000915 |
| 11             | X   | 44733249  | 44733249  | G T     | KDM6A  | intronic   |         | -        | -        | 0.000883 | 0.000815 |
| 11             | X   | 76814150  | 76814150  | A T     | ATRX   | F2165Y     |         | 0.000715 | 0.000746 | -        | -        |
| 11             | X   | 129148158 | 129148158 | A G     | BCORL1 | L470L      |         | -        | -        | 0.000251 | 0.000509 |
| 12             | 2   | 25467448  | 25467448  | C G     | DNMT3A | G543A      | 256033  | 0.001365 | -        | 0.003789 | 0.003858 |
| 12             | 4   | 106155048 | 106155048 | C G     | TET2   | intronic   |         | -        | -        | 0.000993 | 0.001965 |
| 12             | 10  | 112342324 | 112342324 | C T     | SMC3   | S243F      |         | -        | -        | 0.001413 | 0.001779 |
| 13             | 2   | 25457192  | 25457192  | G C     | DNMT3A | R899G      |         | 0.002495 | 0.0015   | 0.001342 | 0.001758 |
| 13             | 2   | 25457242  | 25457242  | C T     | DNMT3A | R882H      | 52944   | -        | -        | 0.001847 | 0.001692 |
| 13             | 2   | 25458658  | 25458658  | A G     | DNMT3A | S839P      |         | 0.000346 | -        | 0.001094 | 0.000638 |
| 13             | 2   | 25463298  | 25463298  | A G     | DNMT3A | F732S      |         | 0.001517 | -        | 0.002979 | 0.003191 |
| 13             | 2   | 25467466  | 25467466  | C A     | DNMT3A | C537F      |         | -        | -        | 0.001861 | 0.003427 |
| 13             | 2   | 25468183  | 25468183  | C A     | DNMT3A | G498V      |         | 0.000907 | -        | 0.003704 | 0.006033 |
| 13             | 2   | 25468195  | 25468195  | C A     | DNMT3A | C494F      |         | 0.000907 | -        | 0.003706 | 0.006041 |
| 13             | 2   | 25470532  | 25470532  | C T     | DNMT3A | W314X      |         | -        | -        | 0.002078 | 0.002564 |
| 13             | 2   | 25470570  | 25470570  | C A     | DNMT3A | G302C      |         | -        | -        | 0.001633 | 0.000994 |
| 13             | 8   | 117859842 | 117859842 | C T     | RAD21  | Y598C      |         | -        | -        | 0.000507 | 0.000562 |
| 14             | 2   | 25470464  | 25470464  | G C     | DNMT3A | S337X      |         | 0.025249 | 0.023997 | 0.042269 | 0.044835 |
| 14             | 12  | 25380260  | 25380260  | T G     | KRAS   | A66A       |         | -        | -        | 0.00628  | 0.005504 |
| 14             | 12  | 25380263  | 25380263  | A G     | KRAS   | S65S       |         | -        | -        | 0.006442 | 0.005566 |
| 14             | X   | 44911015  | 44911015  | C T     | KDM6A  | A239V      |         | -        | -        | 0.004325 | 0.005592 |
| 15             | 2   | 25458670  | 25458670  | T C     | DNMT3A | T835A      |         | -        | -        | 0.000534 | 0.000511 |
| 15             | 10  | 112342321 | 112342321 | T C     | SMC3   | L242P      |         | 0.002797 | 0.00341  | 0.003635 | 0.004656 |
| 15             | 17  | 7577105   | 7577105   | G T     | TP53   | P278H      | 43755   | 0.016175 | 0.016297 | 0.031688 | 0.039548 |
| 15             | 20  | 31024085  | 31024085  | G T     | ASXL1  | R1190S     |         | -        | -        | 0.001109 | 0.000538 |
| 15             | X   | 123234540 | 123234540 | T A     | STAG2  | UTR3       |         | -        | -        | 0.000661 | 0.000639 |
| 16             | 2   | 25463568  | 25463568  | A G     | DNMT3A | I705I      | 1583102 | 0.066263 | 0.078765 | 0.045716 | 0.058166 |
| 17             | 2   | 25463301  | 25463301  | A G     | DNMT3A | F731S      |         | 0.001212 | -        | 0.001883 | 0.002564 |
| 17             | 4   | 106156436 | 106156436 | T G     | TET2   | L466X      |         | -        | -        | 0.000747 | 0.000934 |
| 17             | 4   | 106197045 | 106197045 | C T     | TET2   | T1793I     |         | -        | -        | 0.001308 | 0.001864 |
| 17             | X   | 39932643  | 39932643  | G A     | BCOR   | P652P      |         | 0.005509 | 0.005769 | 0.001855 | 0.002876 |
| 17             | X   | 123224536 | 123224536 | A T     | STAG2  | K1130I     |         | 0.000814 | 0.000899 | 0.000919 | 0.00098  |
| 17             | X   | 129173203 | 129173203 | G A     | BCORL1 | G1522S     |         | -        | -        | 0.000448 | 0.000444 |
| 18             | 2   | 25471070  | 25471070  | G A     | DNMT3A | Q231X      |         | 0.001527 | 0.001449 | 0.001864 | 0.000894 |
| 18             | 4   | 106157961 | 106157961 | G A     | TET2   | W954X      | 87110   | -        | -        | 0.002327 | 0.000871 |
| 18             | 4   | 106182972 | 106182972 | T A     | TET2   | Y1337X     | 87145   | -        | -        | 0.001537 | 0.001304 |
| 18             | 7   | 101840496 | 101840496 | G A     | CUX1   | R602H      |         | 0.147878 | 0.142414 | 0.082825 | 0.06929  |
| 18             | 7   | 148515272 | 148515272 | A G     | EZH2   | intronic   |         | -        | -        | 0.001265 | 0.001335 |
| 18             | X   | 44938634  | 44938634  | A G     | KDM6A  | intronic   |         | 0.013796 | 0.012084 | 0.014613 | 0.013679 |
| 18             | X   | 129149098 | 129149098 | C T     | BCORL1 | R784X      | 1319521 | -        | -        | 0.018627 | 0.017259 |
| 19             | 4   | 106196434 | 106196434 | T G     | TET2   | Y1589X     |         | -        | -        | 0.002147 | 0.002257 |
| 19             | 11  | 119148922 | 119148922 | G A     | CBL    | C381Y      | 34073   | 0.001034 | 0.001371 | 0.001124 | 0.001829 |
| 19             | 17  | 7578427   | 7578427   | T C     | TP53   | H168R      | 43545   | 0.000705 | 0.001006 | 0.003275 | 0.003164 |
| 19             | X   | 76813170  | 76813170  | A G     | ATRX   | intronic   |         | -        | -        | 0.000688 | 0.001001 |
| 19             | X   | 123179344 | 123179344 | C T     | STAG2  | intronic   |         | 0.01895  | 0.015979 | 0.020188 | 0.02219  |
| 20             | 2   | 25505559  | 25505559  | T C     | DNMT3A | K67E       |         | 0.005155 | 0.008004 | 0.007605 | 0.010001 |
| 20             | 4   | 106190798 | 106190798 | G A     | TET2   | R1359H     |         | 0.003494 | 0.003217 | -        | -        |
| 20             | 4   | 106194076 | 106194076 | G A     | TET2   | splicing   |         | -        | -        | 0.00145  | 0.001679 |
| 20             | 8   | 117878873 | 117878873 | C A     | RAD21  | V32V       |         | 0.004314 | 0.003977 | 0.0      |          |

**Supplementary Table 3** Clonal insertion/deletion variants detected by error-corrected sequencing.

| Participant ID | Chr | Start     | End       | Ref                  | Alt | Gene   | AA_Change          | VAF1.1   | VAF1.2   | VAF2.1   | VAF2.2   |
|----------------|-----|-----------|-----------|----------------------|-----|--------|--------------------|----------|----------|----------|----------|
| 7              | 2   | 25463381  | 25463381  | -                    | GTG | DNMT3A | intronic           | 0.006769 | 0.007010 | 0.003021 | -        |
| 7              | 4   | 106155858 | 106155861 | CAGT                 | -   | TET2   | N253fs             | 0.006301 | 0.006283 | 0.013260 | 0.012641 |
| 7              | 4   | 106164895 | 106164895 | -                    | A   | TET2   | Y1255_G1256delinsX | 0.007199 | 0.005162 | 0.007387 | 0.008972 |
| 9              | 2   | 25463567  | 25463567  | A                    | -   | DNMT3A | I705fs             | 0.033141 | 0.022850 | 0.060062 | 0.080059 |
| 9              | 2   | 25467528  | 25467547  | AGCAGCGGGAAGGGTCAGAA | -   | DNMT3A | intronic           | -        | -        | 0.003843 | 0.004093 |
| 11             | 2   | 25468168  | 25468168  | -                    | T   | DNMT3A | T503fs             | -        | -        | 0.002980 | 0.003126 |
| 15             | 8   | 117862892 | 117862895 | TCTC                 | -   | RAD21  | E528fs             | 0.006811 | 0.006486 | 0.014212 | 0.012793 |
| 18             | X   | 123179310 | 123179318 | ATTAATTTT            | -   | STAG2  | intronic           | 0.027702 | 0.025452 | 0.119350 | 0.120730 |
| 20             | 4   | 106190864 | 106190864 | C                    | -   | TET2   | A1381fs            | 0.005228 | 0.003205 | 0.039980 | 0.025601 |

**Supplementary Table 4** Summary of droplet digital PCR validation experiments.

| Participant ID | Gene   | AA_Change | Cosmic  | Wells | Collection 1        |                     |           | Collection 2        |                     |           | ddPCR Control UPN.Collection | Control VAF |
|----------------|--------|-----------|---------|-------|---------------------|---------------------|-----------|---------------------|---------------------|-----------|------------------------------|-------------|
|                |        |           |         |       | ECS VAF Replicate 1 | ECS VAF Replicate 2 | ddPCR VAF | ECS VAF Replicate 1 | ECS VAF Replicate 2 | ddPCR VAF |                              |             |
| 4              | DNMT3A | R320X     | 133724  | 16    | 0.003630            | 0.003580            | 0.006820  | 0.005249            | 0.002602            | 0.006283  | 1016078.2                    | 0.000000    |
| 4              | STAG2  | R305L     | 254953  | 8     | 0.009143            | 0.007774            | 0.010077  | 0.014936            | 0.018524            | 0.017639  | 1016078.1                    | 0.000000    |
| 5              | DNMT3A | R635Q     | 1583088 | 32    | -                   | -                   | 0.000938  | 0.001517            | 0.002674            | 0.001993  | 1819476.1                    | 0.000006    |
| 7              | DNMT3A | P904L     | 87007   | 16    | 0.002364            | -                   | 0.002043  | 0.008514            | 0.010401            | 0.008802  | 1038614.1                    | 0.000025    |
| 7              | TET2   | splice    | 87117   | 24    | -                   | -                   | 0.000856  | 0.001024            | 0.001509            | 0.001363  | 1038614.2                    | 0.000000    |
| 8              | TET2   | G1288S    | 110780  | 16    | 0.001193            | 0.002377            | 0.001720  | 0.001991            | 0.001140            | 0.001615  | 101785A.1                    | 0.000014    |
| 9              | DNMT3A | S714C     | 87011   | 8     | 0.027327            | 0.030296            | 0.028169  | 0.041220            | 0.034103            | 0.038544  | 101785A.2                    | 0.000024    |
| 9              | DNMT3A | R635W     | 87012   | 16    | 0.001896            | 0.003609            | 0.003453  | -                   | 0.001227            | 0.001991  | 1081785.2                    | 0.000000    |
| 9              | TET2   | S1486X    | 211625  | 24    | -                   | -                   | -         | 0.000495            | 0.000588            | 0.000438  | 1060647.1                    | 0.000000    |
| 11             | TP53   | F270S     | 11305   | 24    | -                   | -                   | 0.000457  | 0.000734            | 0.001649            | 0.000586  | 101785A.1                    | 0.000000    |
| 11             | DNMT3A | W860R     | 231568  | 24    | 0.000861            | 0.001500            | 0.000689  | 0.002019            | 0.002493            | 0.002193  | 1060647.2                    | 0.000000    |
| 12             | DNMT3A | G543A     | 256033  | 16    | 0.001365            | -                   | 0.000740  | 0.003789            | 0.003858            | 0.002741  | 101785A.2                    | 0.000000    |
| 13             | DNMT3A | R882H     | 52944   | 24    | -                   | -                   | 0.000216  | 0.001847            | 0.001692            | 0.002011  | 1115442.1                    | 0.000009    |
| 15             | TP53   | P278H     | 43755   | 8     | 0.016175            | 0.016297            | 0.014296  | 0.031688            | 0.039548            | 0.037802  | 1081785.2                    | 0.000074    |
| 16             | DNMT3A | I705T     | 1583102 | 8     | 0.066263            | 0.078765            | 0.075309  | 0.045716            | 0.058166            | 0.054531  | 1115442.1                    | 0.000000    |
| 18             | TET2   | W954X     | 87110   | 16    | -                   | -                   | 0.000162  | 0.002327            | 0.000871            | 0.001183  | 1081785.1                    | 0.000000    |
| 18             | TET2   | Y1337X    | 87145   | 16    | -                   | -                   | 0.000014  | 0.001537            | 0.001304            | 0.001173  | 1060647.1                    | 0.000000    |
| 18             | BCORL1 | R784X     | 1319521 | 8     | -                   | -                   | 0.003080  | 0.018627            | 0.017259            | 0.017138  | 1115442.2                    | 0.000000    |
| 19             | CBL    | C381Y     | 34073   | 24    | 0.001034            | 0.001371            | 0.001035  | 0.001124            | 0.001829            | 0.001252  | 2974576.2                    | 0.000000    |
| 19             | TP53   | H168R     | 43545   | 24    | 0.000705            | 0.001006            | 0.000789  | 0.003275            | 0.003164            | 0.002926  | 1060647.2                    | 0.000000    |
| 20             | KRAS   | G12D      | 521     | 24    | -                   | -                   | 0.000142  | 0.000946            | 0.001437            | 0.000974  | 2974576.1                    | 0.000000    |
| 20             | TET2   | A1381fs   | -       | 8     | 0.005228            | 0.003205            | 0.003524  | 0.039980            | 0.025601            | 0.035660  | 1108362.1                    | 0.000000    |

**Supplementary Table 5** Summary of variant VAFs detected by droplet digital PCR in sorted hematopoietic compartments.

| Participant ID | Gene   | Amino Acid | COSMIC  | Collection | Bulk   | B      | T      | M      |
|----------------|--------|------------|---------|------------|--------|--------|--------|--------|
| 4              | DNMT3A | R320X      | 133724  | 1          | 0.0068 | 0.0048 | 0.0005 | 0.0019 |
|                |        |            |         | 2          | 0.0063 | 0.0063 | 0.0012 | 0.0039 |
| 5              | DNMT3A | R635Q      | 1583088 | 1          | 0.0009 | 0.0006 | 0.0005 | 0.0005 |
|                |        |            |         | 2          | 0.0020 | 0.0020 | 0.0015 | 0.0018 |
| 7              | DNMT3A | P904L      | 87007   | 1          | 0.0020 | 0.0025 | 0.0001 | 0.0009 |
|                |        |            |         | 2          | 0.0088 | 0.0135 | 0.0018 | 0.0037 |
| 8              | TET2   | G1288S     | 110780  | 1          | 0.0017 | 0.0000 | 0.0000 | 0.0006 |
|                |        |            |         | 2          | 0.0016 | 0.0000 | 0.0000 | 0.0001 |
| 9              | DNMT3A | S714C      | 87011   | 1          | 0.0282 | 0.0060 | 0.0018 | 0.0028 |
|                |        |            |         | 2          | 0.0385 | 0.0066 | 0.0044 | 0.0058 |
| 11             | DNMT3A | W860R      | 231568  | 1          | 0.0007 | 0.0000 | 0.0000 | 0.0001 |
|                |        |            |         | 2          | 0.0022 | 0.0000 | 0.0000 | 0.0019 |
| 12             | DNMT3A | G543A      | 256033  | 1          | 0.0007 | 0.0000 | 0.0043 | 0.0048 |
|                |        |            |         | 2          | 0.0027 | 0.0015 | 0.0123 | 0.0121 |
| 13             | DNMT3A | R882H      | 52944   | 1          | 0.0002 | 0.0000 | 0.0000 | 0.0001 |
|                |        |            |         | 2          | 0.0020 | 0.0018 | 0.0000 | 0.0002 |
| 15             | TP53   | P278H      | 43755   | 1          | 0.0143 | 0.0234 | 0.0046 | 0.0035 |
|                |        |            |         | 2          | 0.0378 | 0.0231 | 0.0358 | 0.0084 |
| 16             | DNMT3A | I705T      | 1583102 | 1          | 0.0753 | 0.0760 | 0.0084 | 0.0350 |
|                |        |            |         | 2          | 0.0545 | 0.0701 | 0.0218 | 0.0408 |
| 18             | TET2   | W954X      | 87110   | 1          | 0.0002 | 0.0000 | 0.0000 | 0.0000 |
|                |        |            |         | 2          | 0.0012 | 0.0033 | 0.0004 | 0.0003 |
| 19             | TP53   | H168R      | 43545   | 1          | 0.0008 | 0.0007 | 0.0000 | 0.0000 |
|                |        |            |         | 2          | 0.0029 | 0.0027 | 0.0006 | 0.0000 |
| 20             | KRAS   | G12D       | 521     | 1          | 0.0001 | 0.0000 | 0.0002 | 0.0007 |
|                |        |            |         | 2          | 0.0010 | 0.0037 | 0.0001 | 0.0036 |

**Supplementary Table 6** Primer sequences for library preparation.

| Primer Name   | Sequence                                                                       |
|---------------|--------------------------------------------------------------------------------|
| i5 16N Random | AATGATACGGCGACCACCGAGATCTACACNNNNNNNNNNNNNNNNNACACTCTTCCCTACACGACGCTCTTCCGATCT |
| P5            | AATGATACGGCGACCACCGA                                                           |
| P7            | CAAGCAGAAGACGGCATACGA                                                          |
